# Supplementary material for: A highly specific phage defense system is a conserved feature of the Vibrio cholerae mobilome
Source: PubMed Central journal article supplement (PMC5481146; doi:10.1371/journal.pgen.1006838), 2017-06-08
Supplement: pgen.1006838.s007.pdf [file pgen.1006838.s007.pdf]

**S3 Table.** PLE integration sites in experimental ICP1-mediated PLE transduction experiments

| <b>PLE</b> | <b>Strain</b> | <b>Integration Information</b>        |
|------------|---------------|---------------------------------------|
| PLE 1      | KS518         | In VCR in between VCA0336 and VCA0337 |
|            | KS519         | In VCR in between VCA0329 and VCA0330 |
|            | KS520         | In VCR in between VCA0329 and VCA0330 |
|            | KS441         | In VCR in between VCA0362 and VCA0363 |
|            | KS443         | In VCR in between VCA0354 and VCA0353 |
| PLE 2      | KS543         | Interrupting VCA0581                  |
|            | KS544         | Interrupting VCA0581                  |
|            | KS545         | Interrupting VCA0581                  |
|            | KS546         | Interrupting VCA0581                  |
| PLE 3      | KS551         | In VCR in between VCA0301 and VCA0302 |
|            | KS552         | In VCR in between VCA0435 and VCA0436 |
|            | KS553         | In VCR in between VCA0415 and VCA0416 |
|            | KS554         | In VCR in between VCA0463 and VCA0466 |
| PLE 4      | KS845         | In VCR between VCA0353 and VCA0354    |
|            | KS846         | In VCR between VCA0415 and VCA0416    |
|            | KS847         | In VCR between VCA0407 and VCA0408    |
| PLE 5      | KS704         | In VCR in between VCA0407 and VCA0408 |
|            | KS705         | In VCR in between VCA0443 and VCA0463 |
|            | KS795         | in VCR in between VCA0407 and VCA0441 |
|            | KS797         | In VCR in between VCA0407 and VCA0408 |
