# Supplementary material for: A highly specific phage defense system is a conserved feature of the Vibrio cholerae mobilome
Source: PubMed Central journal article supplement (PMC5481146; doi:10.1371/journal.pgen.1006838), 2017-06-08
Supplement: pgen.1006838.s008.pdf [file pgen.1006838.s008.pdf]

**S4 Table.** Bacterial strains, plasmids and phages used in this study

| Strain/phage name                                      | Description <sup>a</sup>                                                                                                    | Source     |
|--------------------------------------------------------|-----------------------------------------------------------------------------------------------------------------------------|------------|
| <b><i>V. cholerae</i> strains</b>                      |                                                                                                                             |            |
| E7946                                                  | <i>V. cholerae</i> O1, El Tor biotype; SmR, is used as the PLE <sup>-</sup> control                                         | [1]        |
| KS393                                                  | <i>V. cholerae</i> clinical Isolate from the ICDDR, B, harbors PLE 1                                                        | [2]        |
| KS393 S8*                                              | <i>V. cholerae</i> clinical Isolate from the ICDDR, B, harbors PLE 1. Target of ICP1_2011 CRISPR spacer 8 target is mutated | [2]        |
| KS229                                                  | <i>V. cholerae</i> clinical Isolate from the ICDDR, B, harbors PLE 2                                                        | [2]        |
| KS511                                                  | <i>V. cholerae</i> clinical Isolate from the ICDDR, B, harbors PLE 3                                                        | [3]        |
| MJ-1236                                                | <i>V. cholerae</i> clinical Isolate from Matlab, Bangladesh, harbors PLE 4                                                  | [4]        |
| O395                                                   | <i>V. cholerae</i> O1, classical biotype, SmR, isolated in India 1965, harbors PLE 5                                        | [5]        |
| KS393 S8*, PLE 1-Kan <sup>R</sup>                      | KS393 S8*, Kanamycin resistance cassette inserted downstream of ORF 23 in PLE 1                                             | This study |
| KS393 S8* $\Delta$ <i>int</i> , PLE 1-Kan <sup>R</sup> | KS393 S8* PLE 1- Kan <sup>R</sup> containing an in-frame deletion of PLE 1 integrase (constructed by flp-FRT recombination) | This study |
| KS229 PLE 2-Kan <sup>R</sup>                           | KS229, Kanamycin resistance cassette inserted downstream of ORF 27 in PLE 2                                                 | This study |
| KS511 PLE 3-Kan <sup>R</sup>                           | KS511, Kanamycin resistance cassette inserted downstream of ORF 27 in PLE 3                                                 | This study |
| MJ-1236 PLE 4-Kan <sup>R</sup>                         | MJ-1236, Kanamycin resistance cassette inserted downstream of ORF 29 in PLE 4                                               | This study |
| O395 PLE 5-Kan <sup>R</sup>                            | O395, Kanamycin resistance cassette inserted downstream of ORF 29 in PLE 5                                                  | This study |
| KS683                                                  | E7946, PLE 5-Kan, generated via natural transformation of E7946 with gDNA from O395, PLE 5-Kan <sup>R</sup>                 | This study |
| KS790                                                  | E7946, PLE 5-Kan. Target of ICP1_2011 CRISPR spacer 1 target is mutated                                                     | This study |
| KS843                                                  | E7946, PLE 4-Kan, generated via natural transformation of E7946 with gDNA from MJ-1236, PLE 4-Kan <sup>R</sup>              | This study |
| PLE 1                                                  | E7946 containing PLE 1 integrated in VCR in between VCA0329 and VCA0330                                                     | This study |
| PLE 2                                                  | E7946 containing PLE 2 interrupting VCA0581                                                                                 | This study |
| PLE 3                                                  | E7946 containing PLE 3 integrated in VCR in between VCA0415 and VCA0416                                                     | This study |
| PLE 4                                                  | E7946 containing PLE 4 integrated in VCR in                                                                                 | This study |

|                                                                     |                                                                                                                                                |            |
|---------------------------------------------------------------------|------------------------------------------------------------------------------------------------------------------------------------------------|------------|
|                                                                     | between VCA0353 and VCA0354                                                                                                                    |            |
| PLE 5                                                               | E7946 containing PLE 5 integrated in VCR in between VCA0407 and VCA0408                                                                        | This study |
| PLE 1-Kan <sup>R</sup>                                              | E7946 PLE 1, Kanamycin resistance cassette inserted downstream of ORF 23                                                                       | This study |
| PLE 2-Kan <sup>R</sup>                                              | E7946 PLE 2, Kanamycin resistance cassette inserted downstream of ORF 27                                                                       | This study |
| PLE 3-Kan <sup>R</sup>                                              | E7946 PLE 3, Kanamycin resistance cassette inserted downstream of ORF 27                                                                       | This study |
| PLE 4-Kan <sup>R</sup>                                              | E7946 PLE 4, Kanamycin resistance cassette inserted downstream of ORF 29                                                                       | This study |
| PLE 5-Kan <sup>R</sup>                                              | E7946 PLE 5, Kanamycin resistance cassette inserted downstream of ORF 29                                                                       | This study |
| E7946 $\Delta$ <i>lacZ</i> ::Spec <sup>R</sup>                      | E7946 containing a deletion/insertion mutation where the <i>lacZ</i> gene was replaced with a SpecR cassette                                   | This study |
| PLE 1 $\Delta$ VC1807::Kan <sup>R</sup>                             | E7946 PLE 1 containing a deletion/insertion mutation where VC1807 was replaced with a KanR cassette                                            | This study |
| PLE 2 $\Delta$ VC1807::Kan <sup>R</sup>                             | E7946 PLE 2 containing a deletion/insertion mutation where VC1807 was replaced with a KanR cassette                                            | This study |
| PLE 3 $\Delta$ VC1807::Kan <sup>R</sup>                             | E7946 PLE 3 containing a deletion/insertion mutation where VC1807 was replaced with a KanR cassette                                            | This study |
| PLE 4 $\Delta$ VC1807::Kan <sup>R</sup>                             | E7946 PLE 4 containing a deletion/insertion mutation where VC1807 was replaced with a KanR cassette                                            | This study |
| PLE 5 $\Delta$ VC1807::Kan <sup>R</sup>                             | E7946 PLE 5 containing a deletion/insertion mutation where VC1807 was replaced with a KanR cassette                                            | This study |
| PLE 1 $\Delta$ <i>int</i> , PLE 1-Kan <sup>R</sup>                  | E7946 PLE 1- Kan <sup>R</sup> containing an in-frame deletion of PLE 1 integrase (constructed by flp-FRT recombination)                        | This study |
| E7946 $\Delta$ <i>wbeL</i> $\Delta$ <i>lacZ</i> ::Spec <sup>R</sup> | E7946 containing a clean deletion of <i>wbeL</i> and a deletion/insertion mutation where the <i>lacZ</i> gene was replaced with a SpecR marker | This study |
| KS227                                                               | <i>V. cholerae</i> clinical isolate from the ICDDR, B                                                                                          | [3]        |
| A50                                                                 | <i>V. cholerae</i> O1, classical biotype, SmS, isolated in Bangladesh 1963                                                                     | [6]        |
| A57                                                                 | <i>V. cholerae</i> O1, classical biotype, SmS, isolated in India 1980                                                                          | [6]        |
| A68                                                                 | <i>V. cholerae</i> O1, classical biotype, SmS, isolated in Egypt 1949                                                                          | [6]        |
| A111                                                                | <i>V. cholerae</i> O1, classical biotype, SmS, isolated in 1990                                                                                | [6]        |

|       |                                                                                                                 |            |
|-------|-----------------------------------------------------------------------------------------------------------------|------------|
| B33   | <i>V. cholerae</i> clinical Isolate from Beira, Mozambique                                                      | [4]        |
| KS510 | <i>V. cholerae</i> clinical isolate from the ICDDR, B                                                           | [3]        |
| KS409 | <i>V. cholerae</i> clinical isolate from the ICDDR, B                                                           | [3]        |
| KS396 | <i>V. cholerae</i> clinical isolate from the ICDDR, B                                                           | [3]        |
| KS398 | <i>V. cholerae</i> clinical isolate from the ICDDR, B                                                           | [3]        |
| KS400 | <i>V. cholerae</i> clinical isolate from the ICDDR, B                                                           | [3]        |
| KS401 | <i>V. cholerae</i> clinical isolate from the ICDDR, B                                                           | [3]        |
| KS344 | <i>V. cholerae</i> clinical isolate from the ICDDR, B                                                           | [3]        |
| KS255 | <i>V. cholerae</i> clinical isolate from the ICDDR, B                                                           | [3]        |
| KS348 | <i>V. cholerae</i> clinical isolate from the ICDDR, B                                                           | [3]        |
| KS517 | <i>V. cholerae</i> clinical isolate from the ICDDR, B                                                           | [3]        |
| KS516 | <i>V. cholerae</i> clinical isolate from the ICDDR, B                                                           | [3]        |
| KS515 | <i>V. cholerae</i> clinical isolate from the ICDDR, B                                                           | [3]        |
| KS39  | <i>V. cholerae</i> clinical isolate from the ICDDR, B                                                           | [3]        |
| KS518 | E7946 PLE 1-KanR. E7946 added to supernatants of KS393 S8* PLE 1-Kan <sup>R</sup> infected with ICP1_2011_A ΔS9 | This study |
| KS519 | E7946 PLE 1-KanR. E7946 added to supernatants of KS393 S8* PLE 1-Kan <sup>R</sup> infected with ICP1_2011_A ΔS9 | This study |
| KS520 | E7946 PLE 1-KanR. E7946 added to supernatants of KS393 S8* PLE 1-Kan <sup>R</sup> infected with ICP1_2011_A ΔS9 | This study |
| KS441 | KS227 PLE 1-KanR. KS227 added to supernatants of KS393 S8* PLE 1-Kan <sup>R</sup> infected with ICP1_2011_A ΔS9 | This study |
| KS443 | KS227 PLE 1-KanR. KS227 added to supernatants of KS393 S8* PLE 1-Kan <sup>R</sup> infected with ICP1_2011_A ΔS9 | This study |
| KS543 | E7946 PLE 2-KanR. E7946 added to supernatants of KS229 PLE 2-Kan <sup>R</sup> infected with ICP1_2006_E         | This study |
| KS544 | E7946 PLE 2-KanR. E7946 added to supernatants of KS229 PLE 2-Kan <sup>R</sup> infected with ICP1_2006_E         | This study |
| KS545 | E7946 PLE 2-KanR. E7946 added to supernatants of KS229 PLE 2-Kan <sup>R</sup> infected with ICP1_2006_E         | This study |
| KS546 | E7946 PLE 2-KanR. E7946 added to supernatants of KS229 PLE 2-Kan <sup>R</sup> infected with ICP1_2006_E         | This study |
| KS551 | E7946 PLE 3-KanR. E7946 added to supernatants of KS511 PLE 3-Kan <sup>R</sup> infected with ICP1_20011_A        | This study |
| KS552 | E7946 PLE 3-KanR. E7946 added to supernatants of KS511 PLE 3-Kan <sup>R</sup> infected with ICP1_20011_A        | This study |
| KS553 | E7946 PLE 3-KanR. E7946 added to supernatants of KS511 PLE 3-Kan <sup>R</sup> infected with                     | This study |

|       |                                                                                                          |            |
|-------|----------------------------------------------------------------------------------------------------------|------------|
|       | ICP1_20011_A                                                                                             |            |
| KS554 | E7946 PLE 3-KanR. E7946 added to supernatants of KS511 PLE 3-Kan <sup>R</sup> infected with ICP1_20011_A | This study |
| KS845 | E7946 PLE 4-KanR. E7946 added to supernatants of KS843 infected with ICP1_20011_A                        | This study |
| KS846 | E7946 PLE 4-KanR. E7946 added to supernatants of KS843 infected with ICP1_20011_A                        | This study |
| KS847 | E7946 PLE 4-KanR. E7946 added to supernatants of KS843 infected with ICP1_20011_A                        | This study |
| KS704 | E7946 PLE 5-KanR. E7946 added to supernatants of KS683 infected with ICP1_20011_A ΔS9                    | This study |
| KS705 | E7946 PLE 5-KanR. E7946 added to supernatants of KS683 infected with ICP1_20011_A ΔS9                    | This study |
| KS795 | E7946 PLE 5-KanR. E7946 added to supernatants of KS790 infected with ICP1_20011_A ΔS9                    | This study |
| KS797 | E7946 PLE 5-KanR. E7946 added to supernatants of KS790 infected with ICP1_20011_A ΔS9                    |            |

### Phage

|                     |                                                                                                             |            |
|---------------------|-------------------------------------------------------------------------------------------------------------|------------|
| ICP1                | O1-specific phage of <i>V. cholerae</i> O1, unclassified member of the <i>Myoviridae</i> family             | [7]        |
| ICP1_2004_A         | CRISPR-Cas positive ICP1 isolate                                                                            | [7]        |
| ICP1_2005_A         | CRISPR-Cas positive ICP1 isolate                                                                            | [7]        |
| ICP1_2006_E         | CRISPR-Cas positive ICP1 isolate                                                                            | [2]        |
| ICP1_2011_A         | CRISPR-Cas positive ICP1 isolate                                                                            | [2]        |
| ICP1_2011_A ΔS9     | Spontaneous deletion of spacer 9 in phage CRISPR array                                                      | [2]        |
| ICP1_2004_A Δcas2-3 | ΔCRISPR derivative constructed by deleting <i>cas2-3</i>                                                    | This study |
| ICP1_2005_A ΔCRISPR | ΔCRISPR derivative constructed by deleting CRISPR arrays (CR1 and CR2) such that no anti-PLE spacers remain | This study |
| ICP1_2006_E ΔCRISPR | ΔCRISPR derivative constructed by deleting CRISPR arrays (CR1 and CR2) such that no anti-PLE spacers remain | This study |
| ICP1_2011_A Δcas2-3 | ΔCRISPR derivative constructed by deleting <i>cas2-3</i>                                                    | [8]        |
| ICP2                | <i>V. cholerae</i> phage, member of the <i>Podoviridae</i> family                                           | [7]        |
| ICP3                | <i>V. cholerae</i> phage, member of the <i>Podoviridae</i> family, T7-like phage                            | [7]        |

## REFERENCES

1. Levine MM, Black RE, Clements ML, Cisneros L, Saah A, Nalin DR, et al. The pathogenicity of nonenterotoxigenic *Vibrio cholerae* serogroup O1 biotype El Tor isolated from sewage water in Brazil. *J Infect Dis.* 1982;145: 296–299.
2. Seed KD, Lazinski DW, Calderwood SB, Camilli A. A bacteriophage encodes its own CRISPR/Cas adaptive response to evade host innate immunity. *Nature.* 2013;494: 489–491. doi:10.1038/nature11927
3. Dalia AB, Seed KD, Calderwood SB, Camilli A. A globally distributed mobile genetic element inhibits natural transformation of *Vibrio cholerae*. *Proc Natl Acad Sci USA.* 2015;112: 10485–10490. doi:10.1073/pnas.1509097112
4. Grim CJ, Hasan NA, Taviani E, Haley B, Chun J, Brettin TS, et al. Genome sequence of hybrid *Vibrio cholerae* O1 MJ-1236, B-33, and CIRS101 and comparative genomics with *V. cholerae*. *J Bacteriol.* 2010;192: 3524–3533. doi:10.1128/JB.00040-10
5. Taylor RK, Miller VL, Furlong DB, Mekalanos JJ. Use of *phoA* gene fusions to identify a pilus colonization factor coordinately regulated with cholera toxin. *Proc Natl Acad Sci USA.* 1987;84: 2833–2837.
6. Mutreja A, Kim DW, Thomson NR, Connor TR, Lee JH, Kariuki S, et al. Evidence for several waves of global transmission in the seventh cholera pandemic. *Nature.* 2011;477: 462–465. doi:10.1038/nature10392
7. Seed KD, Bodi KL, Kropinski AM, Ackermann H-W, Calderwood SB, Qadri F, et al. Evidence of a dominant lineage of *Vibrio cholerae*-specific lytic bacteriophages shed by cholera patients over a 10-Year Period in Dhaka, Bangladesh. *mBio.* 2010;2: e00334–10–e00334–10. doi:10.1128/mBio.00334-10
8. Box AM, McGuffie MJ, O'Hara BJ, Seed KD. Functional analysis of bacteriophage immunity through a Type I-E CRISPR-Cas System in *Vibrio cholerae* and its application in bacteriophage genome engineering. *J Bacteriol.* 2016;198: 578–590. doi:10.1128/JB.00747-15
