# Supplementary material for: A highly specific phage defense system is a conserved feature of the Vibrio cholerae mobilome
Source: PLOS journal article supplement (doi:10.1371/journal.pgen.1006838), 2017-06-08
Supplement: S6 (10.1371/journal.pgen.1006838.s006) [file journal.pgen.1006838.s006]

**S2 Table.** PLE integration sites in naturally occurring *V. cholerae* isolates

| PLE   | Strain <sup>a</sup>        | Integration Information            |
|-------|----------------------------|------------------------------------|
| PLE 1 | KS393 (ICDDR,B 2011)       | In VCR between VCA0462 and VCA0463 |
|       | KS510 (ICDDR,B 2009)       | In VCR between VCA0462 and VCA0463 |
|       | KS409 (ICDDR,B 2010)       | In VCR between VCA0462 and VCA0463 |
|       | KS396 (ICDDR,B 2011)       | In VCR between VCA0462 and VCA0463 |
|       | KS398 (ICDDR,B 2011)       | In VCR between VCA0462 and VCA0463 |
|       | KS400 (ICDDR,B 2011)       | In VCR between VCA0462 and VCA0463 |
|       | KS401 (ICDDR,B 2011)       | In VCR between VCA0462 and VCA0463 |
| PLE 2 | KS229 (ICDDR,B 2006)       | Interrupting VCA0581               |
|       | KS344 (ICDDR,B 2005)       | Interrupting VCA0581               |
|       | KS255 (ICDDR,B 2006)       | Interrupting VCA0581               |
|       | KS348 (ICDDR,B 2007)       | Interrupting VCA0581               |
|       | KS517 (ICDDR,B 2008)       | Interrupting VCA0581               |
| PLE 3 | KS511 (ICDDR,B 2008)       | In VCR between VCA0441 and VCA0440 |
|       | KS516 (ICDDR,B 2009)       | In VCR between VCA0441 and VCA0440 |
|       | KS515 (ICDDR,B 2009)       | In VCR between VCA0441 and VCA0440 |
|       | KS39 (ICDDR,B 2009)        | In VCR between VCA0441 and VCA0440 |
| PLE 4 | MJ-1236 (Bangladesh, 1994) | In VCR between VCA0491 and VCA0492 |
|       | B33 (Mozambique, 2004)     | In VCR between VCA0491 and VCA0492 |
| PLE 5 | O395 (India 1965)          | In VCR between VCA0481 and VCA0480 |
|       | A50 (Bangladesh 1963)      | In VCR between VCA0481 and VCA0480 |
|       | A57 (India 1980)           | In VCR between VCA0481 and VCA0480 |
|       | A68 (Egypt 1949)           | In VCR between VCA0481 and VCA0480 |
|       | A111 (N.I 1990)            | In VCR between VCA0481 and VCA0480 |

<sup>a</sup> Strain number is shown beside location and year of isolation
